# Supplementary material for: So I Made up My Mind: Introducing a Study of Adult Learner Persistence in Library Literacy Programs.
Source: publisher site journal article supplement (doi:10.3762/bjoc.13.101), 2000-01-01
Supplement: Additional file 1 [file 1860-5397-13-101-S1.pdf]

# Supporting Information File 1

for

## Synthesis and enzymatic ketonization of the 5-(halo)-2-hydroxymuconates and 5-(halo)-2-hydroxy-2,4-pentadienoates

Tyler M. M. Stack<sup>1</sup>, William H. Johnson Jr.<sup>2</sup> and Christian P. Whitman<sup>\*2</sup>

Address: <sup>1</sup>Department of Molecular Biosciences, College of Natural Sciences, 1 University Station, University of Texas, Austin, TX 78712, USA and <sup>2</sup>Division of Chemical Biology and Medicinal Chemistry, College of Pharmacy, 1 University Station, University of Texas, Austin, TX 78712, USA

Email: Christian P. Whitman<sup>\*</sup> - [whitman@austin.utexas.edu](mailto:whitman@austin.utexas.edu)

<sup>\*</sup>Corresponding author

### Analytical data

#### Table of Contents

|                                                                                                                                                                           |    |
|---------------------------------------------------------------------------------------------------------------------------------------------------------------------------|----|
| <b>General NMR information</b> .....                                                                                                                                      | S2 |
| <b><sup>1</sup>H NMR, <sup>13</sup>C NMR, and <sup>19</sup>F NMR spectral data for 5-bromo-2-hydroxymuconate (3c) and 5-fluoro-2-hydroxymuconate (3d)</b> .....           | S2 |
| <b><sup>1</sup>H NMR, <sup>13</sup>C NMR, and <sup>19</sup>F NMR spectral data for 5-bromo-2-hydroxypentadienoate (5c) and 5-fluoro-2-hydroxypentadienoate (5d)</b> ..... | S2 |
| <b><sup>1</sup>H NMR spectral data for equilibrium products of the 5-halo-2-hydroxypentadienoates in sodium phosphate buffer pH 7.</b> .....                              | S3 |
| <b>Figure S1: Time-dependent enzymatic conversions of 5-halo-2-hydroxypentadienoates to the corresponding <math>\alpha,\beta</math>-unsaturated ketones.</b> .....        | S4 |

## General NMR information

Nuclear magnetic resonance spectra ( $^1\text{H}$  NMR,  $^{13}\text{C}$  NMR, and  $^{19}\text{F}$  NMR) were recorded on a Varian Unity INOVA-500 or -300 MHz spectrometer, or on an Agilent 400 MHz spectrometer, and reported in parts per million (ppm) referenced to the residual protio solvent signal as an internal standard.

## $^1\text{H}$ NMR, $^{13}\text{C}$ NMR, and $^{19}\text{F}$ NMR spectral data for 5-bromo-2-hydroxyaconate (**3c**) and 5-fluoro-2-hydroxyaconate (**3d**)

(4Z)-**3c**:  $^1\text{H}$  NMR ( $\text{CD}_3\text{OD}$ , 300 MHz)  $\delta$  6.46 (1H, d,  $J = 11.7$  Hz, H3), 8.14 (1H, d,  $J = 11.7$  Hz, H4) ppm;  $^{13}\text{C}$  NMR ( $\text{CD}_3\text{OD}$ , 75 MHz)  $\delta$  106.6 (C3), 115.1 (C4), 135.1 (C5), 148.9 (C2), 164.7 (C6), 165.1 (C1) ppm. (4Z)-**3d**:  $^1\text{H}$  NMR ( $\text{DMSO-}d_6$ , 600 MHz)  $\delta$  6.20 (1H, d,  $J = 12.1$  Hz, H3), 6.94 (1H, dd,  $J_{\text{HF}} = 32.1$  Hz, H4) ppm;  $^{13}\text{C}$  NMR ( $\text{DMSO-}d_6$ , 100.5 MHz)  $\delta$  100.1 (C3), 111.6, 111.7 (d, C4), 145.3, 147.9 (d,  $J_{\text{C,F}} = 263$  Hz, C5), 146.9 (C2), 161.2, 161.6 (d, C6), 164.5 (C1) ppm.  $^{19}\text{F}$  NMR ( $\text{DMSO-}d_6$ , 564 MHz)  $\delta$  -128.7 (d,  $J_{\text{H,F}} = 32.1$  Hz) ppm. The coupling constant (32.1 Hz) for the C4 proton and C5 fluoride indicates a *trans*-like relationship. Hence, the procedure affords (4Z)-**3d**. It can be inferred based on this observation that (4Z)-**3c** was also generated.

## $^1\text{H}$ NMR, $^{13}\text{C}$ NMR, and $^{19}\text{F}$ NMR spectral data for 5-bromo-2-hydroxypentadienoate (**5c**) and 5-fluoro-2-hydroxypentadienoate (**5d**)

(4Z)-**5c**:  $^1\text{H}$  NMR ( $\text{CD}_3\text{OD}$ , 400 MHz)  $\delta$  6.36 (1H, dd,  $J = 1.2$  Hz, 7.2 Hz, H3), 6.42 (1H, dd,  $J = 1.2$  Hz, 10.8 Hz, H5), 7.08 (1H, dd,  $J = 7.2$  Hz, 10.8 Hz, H4) ppm;  $^{13}\text{C}$  NMR ( $\text{CD}_3\text{OD}$ , 75 MHz)  $\delta$  107.7 (C3), 110.5 (C4), 127.6 (C5), 145.1 (C2), 167.7 (C1) ppm. (4Z)-**5d**:  $^1\text{H}$  NMR ( $\text{DMSO-}d_6$ , 600 MHz)  $\delta$  5.85 (1H, ddd,  $J = 4.4$  Hz, 11.7 Hz,  $J_{\text{HF}} = 43.1$  Hz, H4), 6.20 (1H, d,  $J =$

11.7 Hz, H3), 6.77 (1H, dd,  $J = 4.1$  Hz,  $J_{\text{HF}} = 84.3$  Hz, H5), 9.07 (1H, s, H2), 13.04 (1H, br, H1) ppm;  $^{13}\text{C}$  NMR (DMSO- $d_6$ , 75 MHz)  $\delta$  100.9 (d,  $J_{\text{C,F}} = 5.9$  Hz, C3), 105.1 (d,  $J_{\text{C,F}} = 1.2$  Hz, C4), 142.1 (d,  $J_{\text{C,F}} = 4.7$  Hz, C2), 149.5 (d,  $J_{\text{C,F}} = 267$  Hz, C5), 165.3 (C1) ppm.  $^{19}\text{F}$  NMR (DMSO- $d_6$ , 282 MHz)  $\delta$  -124.3 (dd,  $J_{\text{H,F}} = 42.3$  Hz, 83.5 Hz) ppm. Both the  $^1\text{H}$  and  $^{13}\text{C}$  NMR assignments were verified by Heteronuclear Single Quantum Correlation (HSQC) experiments.

**$^1\text{H}$  NMR spectral data for equilibrium products of the 5-halo-2-hydroxypentadienoates in sodium phosphate buffer pH 7.**

(4Z)-**5b**:  $^1\text{H}$  NMR (100 mM  $\text{NaH}_2\text{PO}_4$  buffer in  $\text{H}_2\text{O}$ , pH 7, 5% DMSO- $d_6$ , 600 MHz)  $\delta$  6.00 (1H, dd,  $J = 0.9$  Hz, 7.1 Hz, H3), 6.52 (1H, dd,  $J = 7.1$  Hz, 11.2 Hz, H4), 6.80 (1H, not resolved, H5) ppm; (4Z)-**11b**:  $\delta$  3.53 (2H, dd,  $J = 1.4$  Hz, 7.0 Hz, H3), 5.83 (1H, dt,  $J = 7.0$  Hz, 7.0 Hz, H4), 6.20 (1H, dt,  $J = 7.0$  Hz, 1.4 Hz, H5) ppm; (3E)-**9b**:  $\delta$  4.18 (2H, dd,  $J = 1.6$  Hz, 5.8 Hz, H5), 6.32 (1H, dt,  $J = 1.6$  Hz, 15.8 Hz, H3), 6.86 (1H, dt,  $J = 5.8$  Hz, 15.8 Hz, H4) ppm; (4Z)-**5c**:  $^1\text{H}$  NMR (100 mM  $\text{NaH}_2\text{PO}_4$  buffer in  $\text{H}_2\text{O}$ , pH 7, 5% DMSO- $d_6$ , 600 MHz)  $\delta$  6.13 (1H, dd,  $J = 0.9$  Hz, 10.9 Hz, H3), 6.16 (1H, dd,  $J = 0.9$  Hz, 11.2 Hz, H5), 6.83 (1H, dd,  $J = 7.1$  Hz, 10.9 Hz, H4) ppm; (4Z)-**11c**:  $\delta$  3.52 (2H, dd,  $J = 1.3$  Hz, 6.9 Hz, H3), 6.17 (1H, d,  $J = 7.0$  Hz, H5), 6.37 (1H, dt,  $J = 7.0$  Hz, 1.3 Hz, H4) ppm; (3E)-**9c**:  $\delta$  4.02 (2H, dd,  $J = 1.1$  Hz, 7.2 Hz, H5), 6.26 (1H, dt,  $J = 1.1$  Hz, 15.8 Hz, H3), 6.87 (1H, dt,  $J = 7.2$  Hz, 15.8 Hz, H4) ppm;  $^1\text{H}$  NMR (100 mM  $\text{NaH}_2\text{PO}_4$  in  $\text{H}_2\text{O}$ , pH 7, 5% DMSO- $d_6$ , 600 MHz) (4Z)-**5d**:  $\delta$  5.64 (1H, ddd,  $J = 4.6$  Hz, 11.6 Hz,  $J_{\text{HF}} = 42.2$  Hz, H4), 6.09 (1H, d,  $J = 11.6$  Hz, H3), 6.45 (1H, dd,  $J = 4.6$  Hz,  $J_{\text{HF}} = 83.9$  Hz, H5) ppm; (4Z)-**11d**:  $\delta$  3.39 (2H, dt,  $J = 1.3$  Hz, 7.4 Hz, H3), 4.85 (1H, m, H4), 6.53 (1H, dt,  $J = 4.7$  Hz, 1.3 Hz,  $J_{\text{HF}} = 85$  Hz, H5) ppm.

In addition, the hydrates of **11b** (7%), **11c** (13%), and **11d** (22%) were observed. The  $^1\text{H}$  NMR signals for the three hydrates are as follows. (4Z)-**11b** (hydrate):  $\delta$  2.53 (2H, dd,  $J = 1.7$

Hz, 7.0 Hz, H3), 5.63 (1H, dt,  $J = 7.1$  Hz, 7.1 Hz, H4), 6.05 (1H, dt,  $J = 1.7$  Hz, 7.1 Hz, H5) ppm; (4Z)-11c (hydrate):  $\delta$  2.51 (2H, dd,  $J = 1.6$  Hz, 6.9 Hz, H3), 5.97 (1H, dt,  $J = 6.9$  Hz, 7.0 Hz, H4), 6.20 (1H, dt,  $J = 1.6$  Hz, 7.0 Hz, H5) ppm; (4Z)-11d (hydrate):  $\delta$  2.41 (2H, dt,  $J = 1.4$  Hz, 7.7 Hz, H3), 6.42 (1H, dt,  $J = 1.4$  Hz, 4.78 Hz,  $J_{HF} = 85.9$  Hz, H5) ppm. The signal corresponding to H4 appears to be obscured by the water signal.

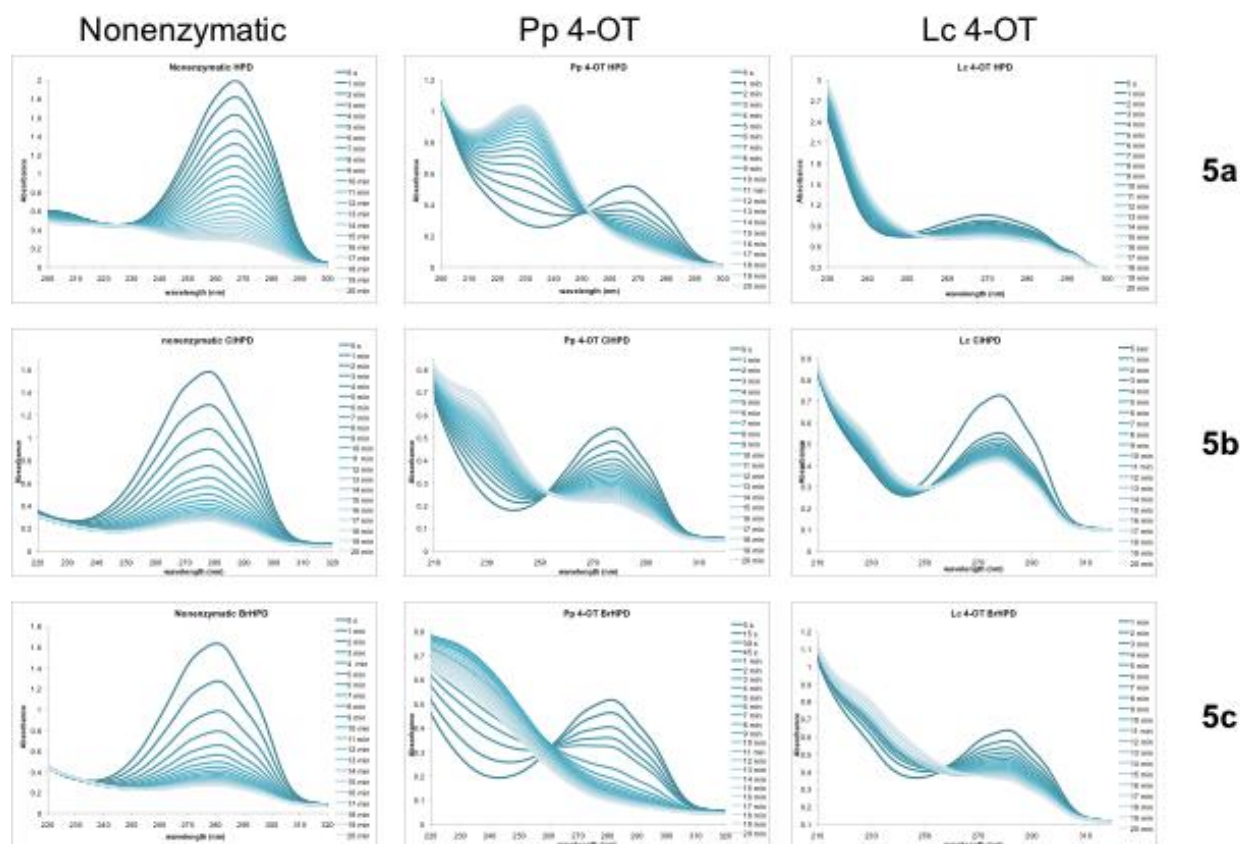

**Figure S1: Time-dependent enzymatic conversions of 5-halo-2-hydroxypentadienoates to the corresponding  $\alpha,\beta$ -unsaturated ketones.**

Comparison of non-enzymatic and enzymatic UV changes of **5a**, **5b**, and **5c**. Each UV trace was obtained by monitoring 150  $\mu$ M of **5a**, **5b**, or **5c** in 20 mM sodium phosphate buffer, pH 7.3. The UV progression was monitored for 20 min, with one trace displayed per minute. The UV traces

are shown as fading from blue to gray, with the initial trace (5 s) is the darkest trace, and the final 20 min trace is the lightest trace. In the traces containing Pp 4-OT, 2  $\mu\text{M}$  (monomer mass) was used, while in the traces containing Lc 4-OT, 2.3  $\mu\text{M}$  (monomer mass) was used except in the mixture containing **5a**, where 35  $\mu\text{M}$  (monomer mass) was used. The abbreviations HPD, ClHPD, and BrHPD refer to **5a**, **5b**, and **5c**, respectively.
